# Supplementary material for: Age estimation from the acetabulum in South African black males
Source: Springer Nature journal article supplement (doi:10.1007/s00414-015-1299-7), 2015-12-11
Supplement: MOESM1 [file 8447806]

Appendix A

|  | κ0 | κ1 | κ2 | κ3 | κ4 | κ5 | κ6 |
| --- | --- | --- | --- | --- | --- | --- | --- |
| V1 | -0.060589 | -0.090909 | 0.040529 | 0.049658 |  |  |  |
| VAR | 0.006509 | 0.006919 | 0.003976 | 0.004788 |  |  |  |
| SE | 0.080677 | 0.083178 | 0.063059 | 0.069193 |  |  |  |
| z | -0.751012 | -1.092940 | 0.642720 | 0.717667 |  |  |  |
| p | 0.452645 | 0.274420 | 0.520406 | 0.472963 |  |  |  |
| UCl | 0.097537 | 0.072121 | 0.164125 | 0.185276 |  |  |  |
| LCl | -0.218716 | -0.253939 | -0.083067 | -0.085961 |  |  |  |
|  |  |  |  |  |  |  |  |
| V2 | 0.090485 | 0.283675 | 0.125915 | 0.203428 | 0.360795 | 0.273768 | 0.414919 |
| VAR | 0.021133 | 0.021273 | 0.020002 | 0.020958 | 0.020096 | 0.027632 | 0.047045 |
| SE | 0.145373 | 0.145854 | 0.141429 | 0.144768 | 0.141759 | 0.166229 | 0.216899 |
| z | 0.622432 | 1.944918 | 0.890304 | 1.405200 | 2.545116 | 1.646932 | 1.912959 |
| p | 0.533657 | 0.051784 | 0.373303 | 0.159962 | 0.010924 | 0.099572 | 0.05575 |
| UCl | 0.375416 | 0.569551 | 0.403118 | 0.487172 | 0.638645 | 0.599576 | 0.840042 |
| LCl | -0.194446 | -0.002199 | -0.151287 | -0.080317 | 0.082946 | -0.052041 | -0.010203 |
|  |  |  |  |  |  |  |  |
| V3 | -0.121575 | -0.018513 | -0.024474 | 0.073095 | 0.035111 | 0.541809 |  |
| VAR | 0.025635 | 0.020555 | 0.020002 | 0.020002 | 0.031008 | 0.039255 |  |
| SE | 0.160109 | 0.143371 | 0.141429 | 0.141429 | 0.176090 | 0.198129 |  |
| z | -0.759327 | -0.129123 | -0.173043 | 0.516831 | 0.199393 | 2.734619 |  |
| p | 0.44766 | 0.897260 | 0.862617 | 0.605274 | 0.841955 | 0.006245 |  |
| UCl | 0.192238 | 0.262495 | 0.252729 | 0.350298 | 0.380248 | 0.930144 |  |
| LCl | -0.435388 | -0.299521 | -0.301676 | -0.204107 | -0.310026 | 0.153475 |  |
|  |  |  |  |  |  |  |  |
| V4 | 0,385445 | 0,363426 | 0,171843 | 0,232320 | 0,400253 |  |  |
| VAR | 0,020728 | 0,024867 | 0,020679 | 0,020009 | 0,020619 |  |  |
| SE | 0,143971 | 0,157692 | 0,143803 | 0,141454 | 0,143592 |  |  |
| z | 2,677231 | 2,304651 | 1,194981 | 1,642369 | 2,787427 |  |  |
| p | 0,007423 | 0,021186 | 0,232094 | 0,100513 | 0,005313 |  |  |
| UCl | 0,667629 | 0,672503 | 0,453697 | 0,509570 | 0,681693 |  |  |
| LCl | 0,103261 | 0,0543488 | -0,110012 | -0,044930 | 0,118812 |  |  |
|  |  |  |  |  |  |  |  |
| V5 | 0,04 | -0,031923 | 0,011156 | 0,018003 | 0,181548 | 0,436764 |  |
| VAR | 0,022727 | 0,020958 | 0,020616 | 0,020442 | 0,020009 | 0,024306 |  |
| SE | 0,150755 | 0,144768 | 0,143583 | 0,142975 | 0,141456 | 0,155904 |  |
| z | 0,265329 | -0,220513 | 0,077698 | 0,125919 | 1,283417 | 2,80148 |  |
| p | 0,790755 | 0,825471 | 0,938068 | 0,899796 | 0,199346 | 0,005087 |  |
| UCl | 0,335481 | 0,251821 | 0,292579 | 0,298235 | 0,458802 | 0,742337 |  |
| LCl | -0,255481 | -0,315668 | -0,270266 | -0,262228 | -0,095707 | 0,131191 |  |
|  |  |  |  |  |  |  |  |
| V6 | 0,166122 | 0,141749 | 0,016575 | -0,008 | 0,241932 | 0,486301 |  |
| VAR | 0,023846 | 0,020177 | 0,026982 | 0,02 | 0,020106 | 0,042654 |  |
| SE | 0,154420 | 0,142046 | 0,164263 | 0,141421 | 0,141796 | 0,206529 |  |
| z | 1,075775 | 0,997911 | 0,100906 | -0,056568 | 1,706197 | 2,354643 |  |
| p | 0,282028 | 0,318322 | 0,919625 | 0,954889 | 0,087971 | 0,018541 |  |
| UCl | 0,468786 | 0,420161 | 0,338531 | 0,269186 | 0,519852 | 0,891098 |  |
| LCl | -0,136542 | -0,136661 | -0,305380 | -0,285186 | -0,035988 | 0,081505 |  |
|  |  |  |  |  |  |  |  |
| V7 | 0,090485 | 0,244797 | 0,038188 | 0,153021 | 0,163462 | 0,298246 | 0,746622 |
| VAR | 0,021133 | 0,021719 | 0,020137 | 0,020679 | 0,020288 | 0,028596 | 0,073615 |
| SE | 0,145373 | 0,147372 | 0,141904 | 0,143804 | 0,142438 | 0,169105 | 0,271321 |
| z | 0,622433 | 1,661086 | 0,269108 | 1,064097 | 1,147601 | 1,763671 | 2,751806 |
| p | 0,533657 | 0,096696 | 0,787847 | 0,287285 | 0,251133 | 0,077787 | 0,005927 |
| UCl | 0,375417 | 0,533647 | 0,316320 | 0,434876 | 0,442639 | 0,629691 | 1,278410 |
| LCl | -0,194447 | -0,044052 | -0,239945 | -0,128834 | -0,115716 | -0,033200 | 0,214833 |

VAR – variance, SE – standard error, z - test statistic (kappa/std deviation), p – p-value, UCI – upper confidence interval (95%), LCI – lower confidence interval (95%)
